# Supplementary material for: A VIGS screen identifies immunity in the Arabidopsis Pla‐1 accession to viruses in two different genera of the Geminiviridae
Source: PubMed Central journal article supplement (PMC5725698; doi:10.1111/tpj.13716), 2017-10-24
Supplement: TPJ-92-796-s001.pdf [file TPJ-92-796-s001.pdf]

**Figure S1:** Thumbnail images of *CH-42* VIGS in different *Arabidopsis* accessions. Most of the accessions are paired with a Col-0 plant (right) inoculated at the same time. Table S1 provides additional information.

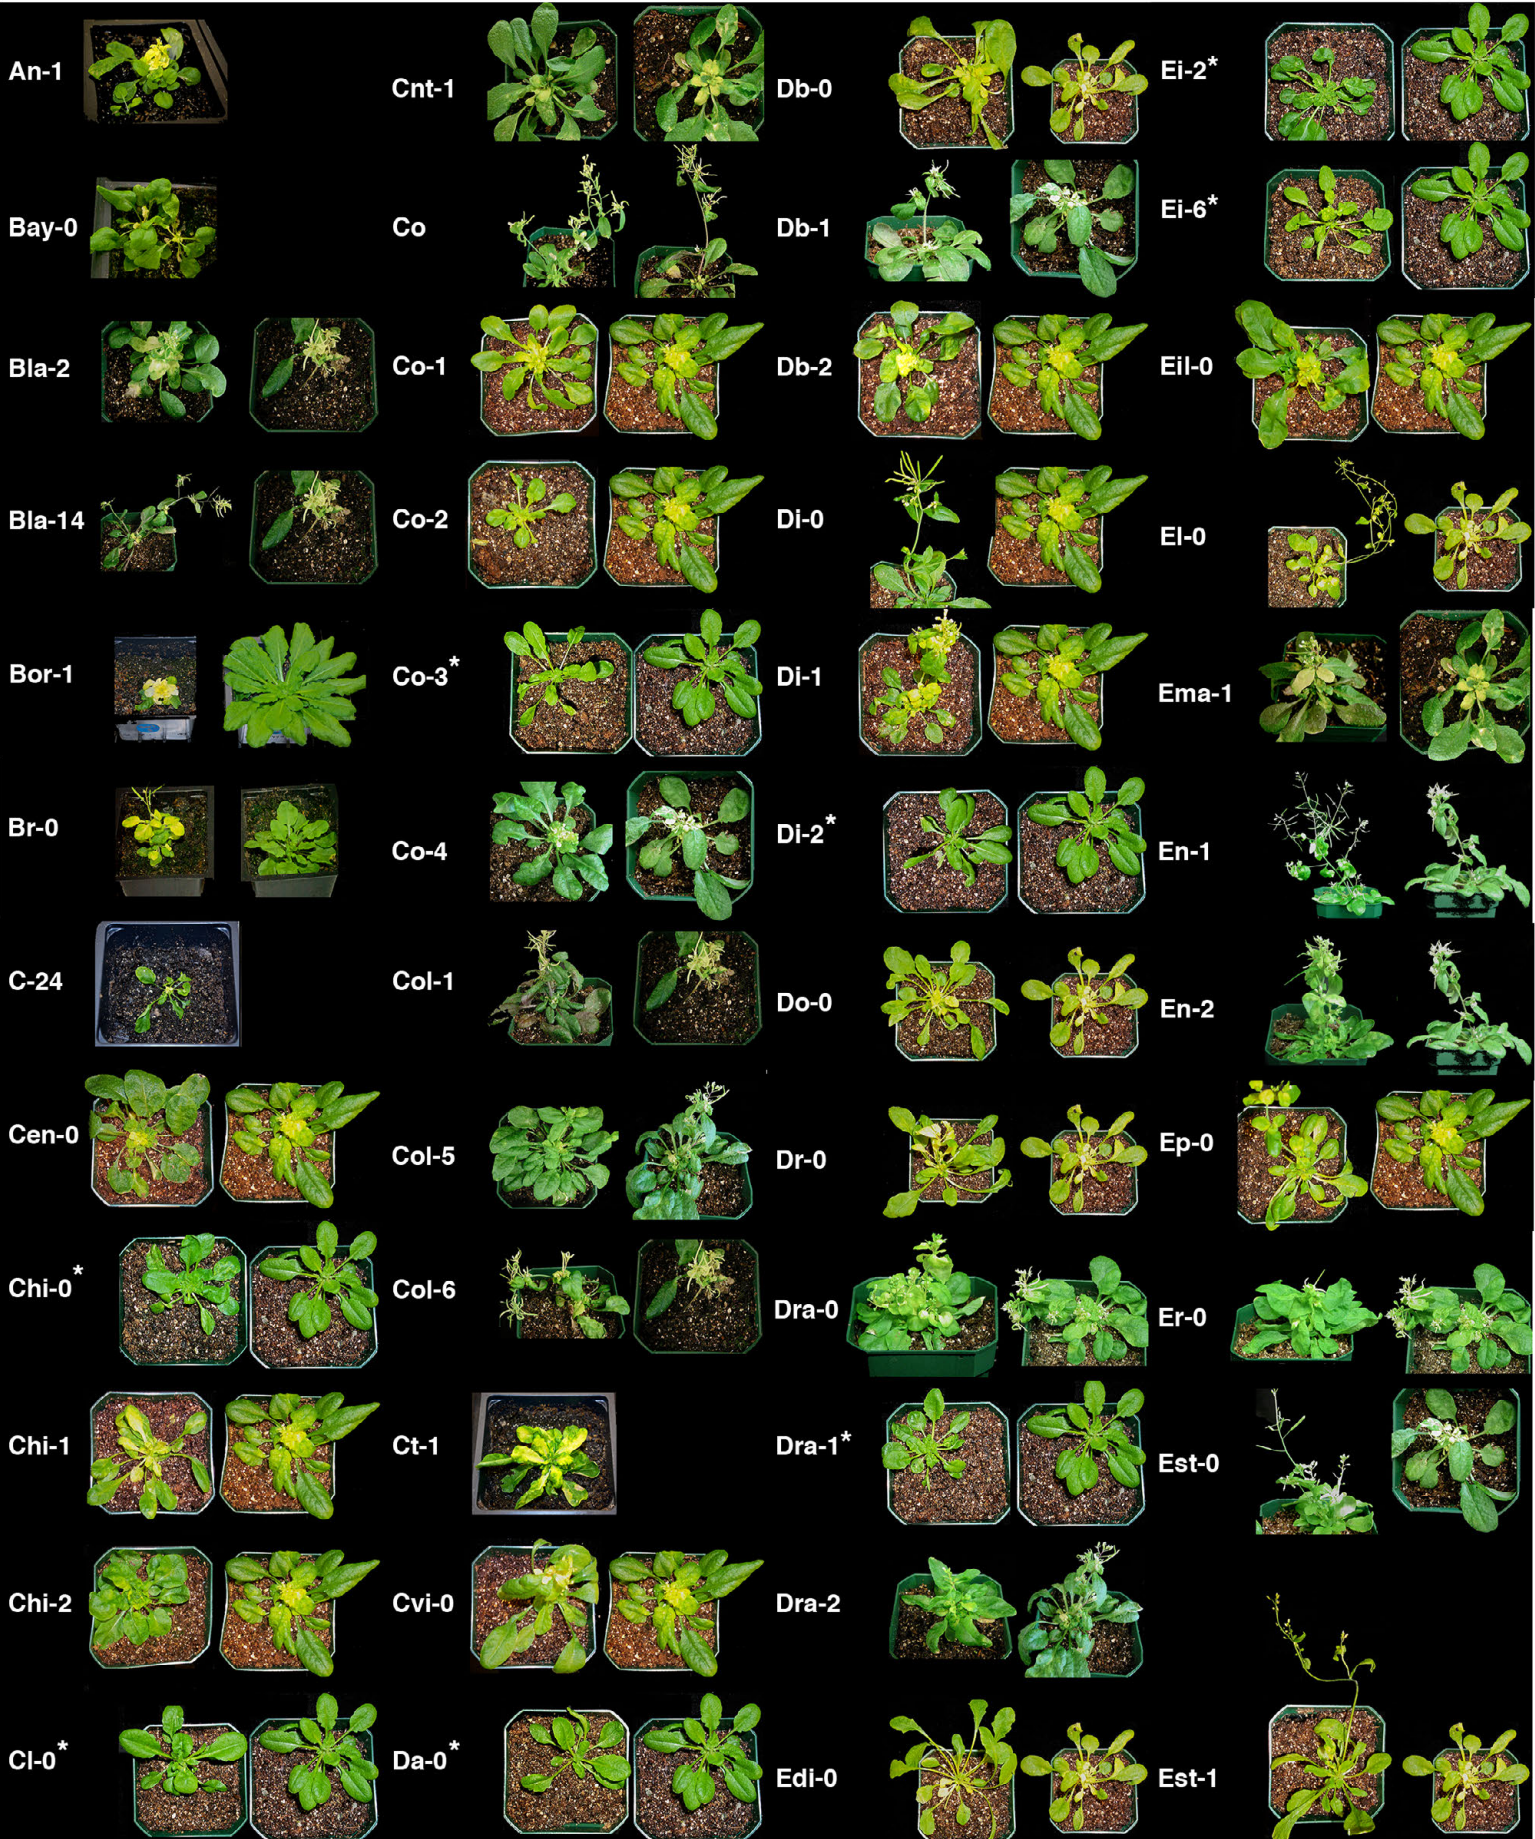

\* both the accession and Col-0 were inoculated with a GFP vector to assess symptoms

\*\* plant on the right is the same accession planted at the same time but not inoculated



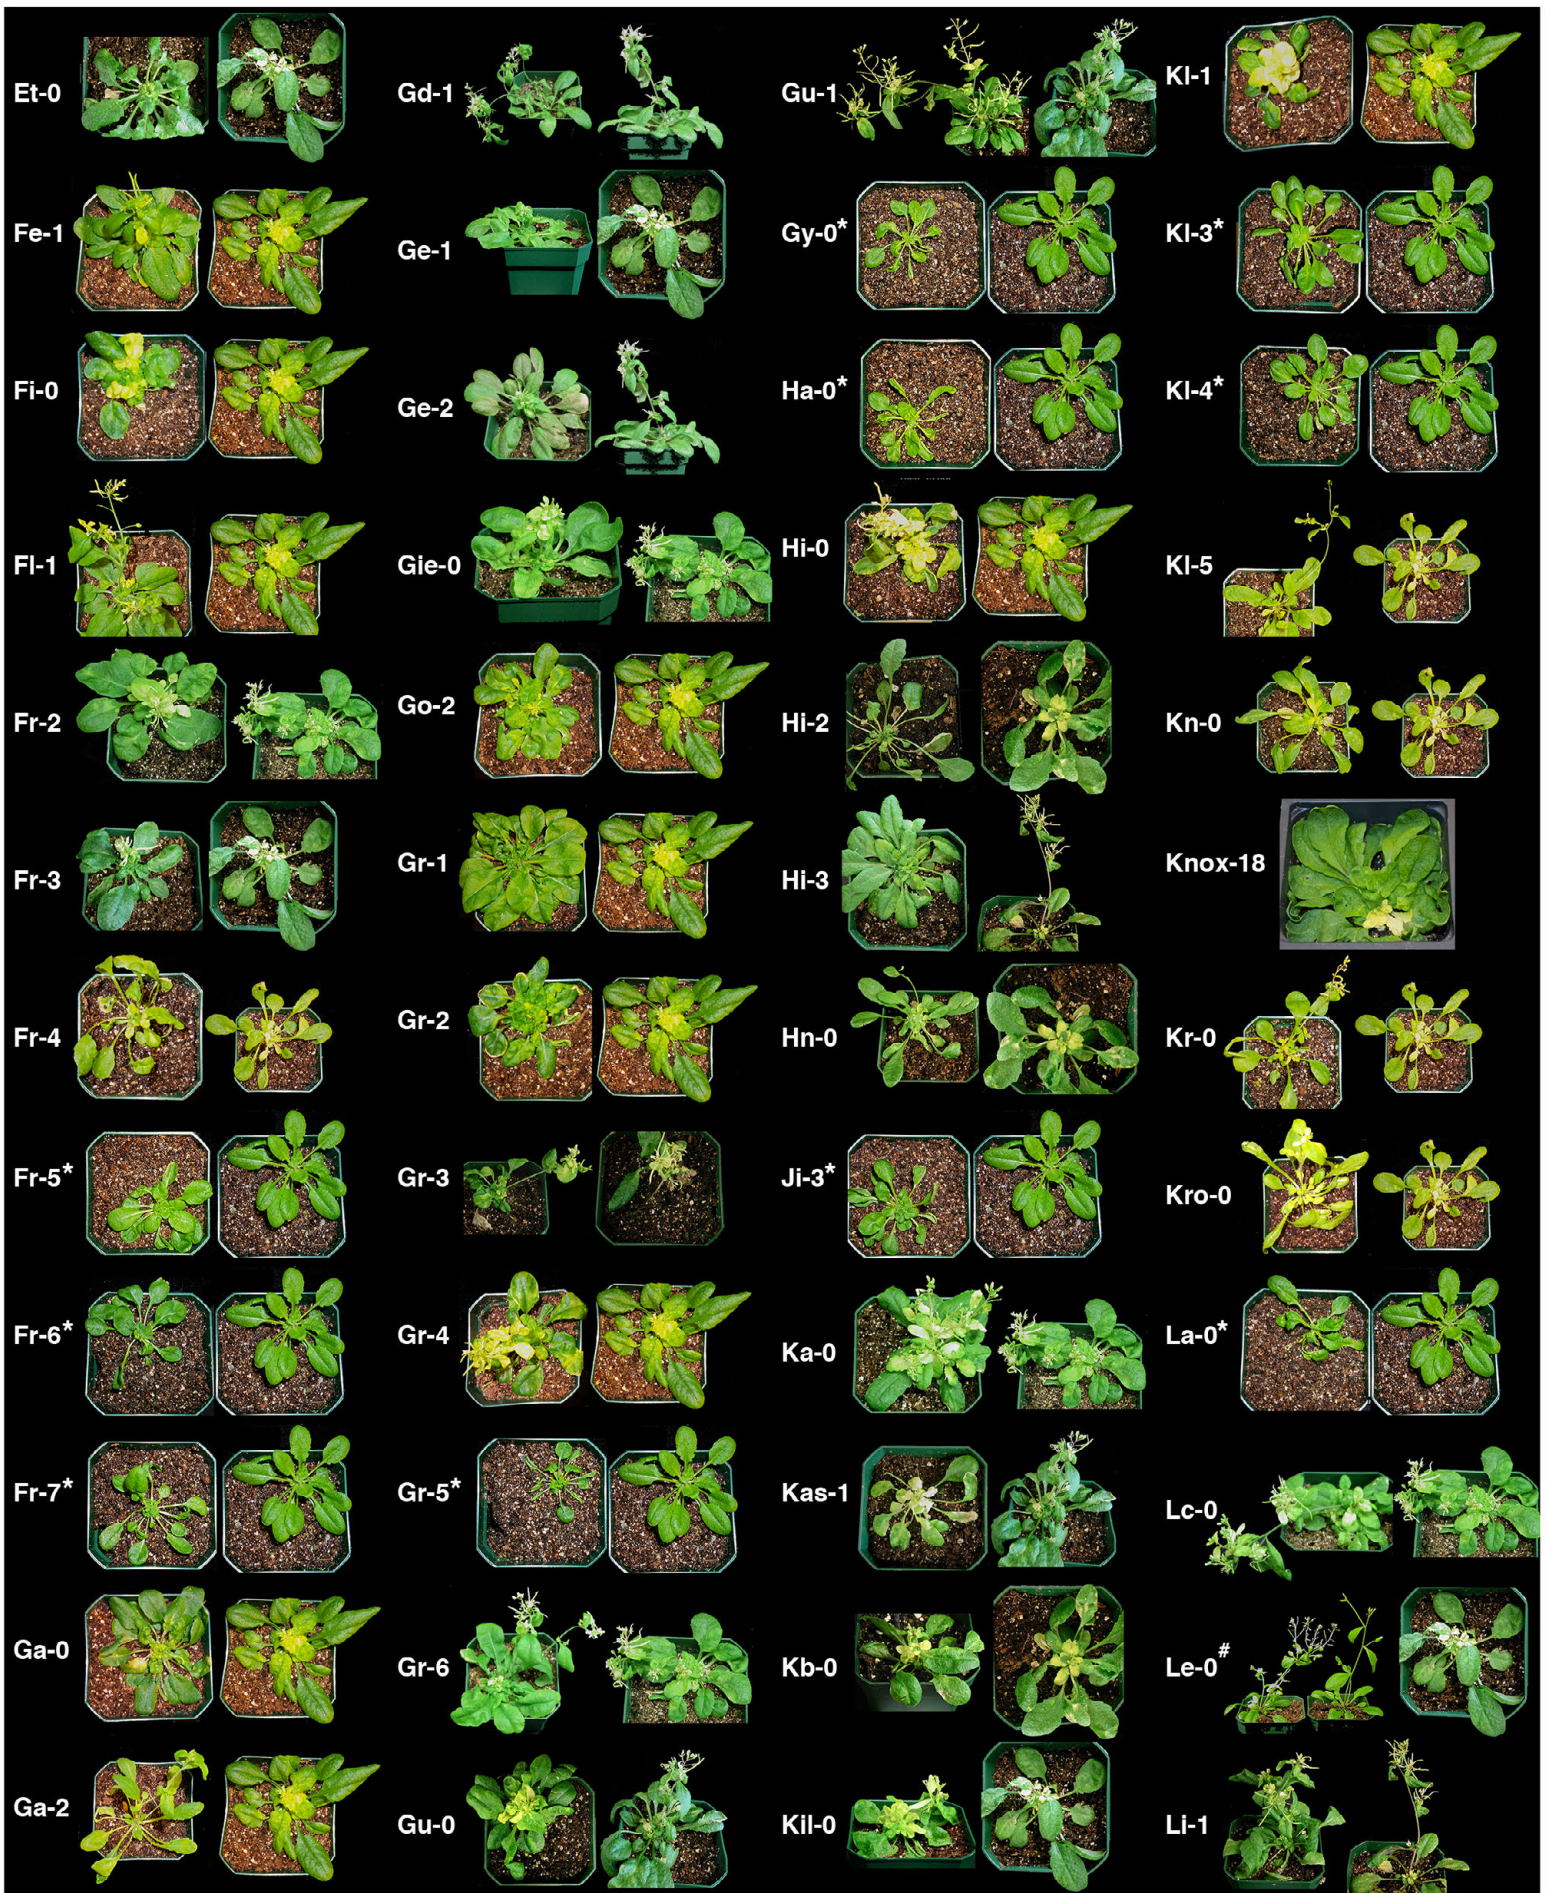

\* both the accession and Col-0 were inoculated with a GFP vector to assess symptoms  
 \*\* plant on the right is the same accession planted at the same time but not inoculated



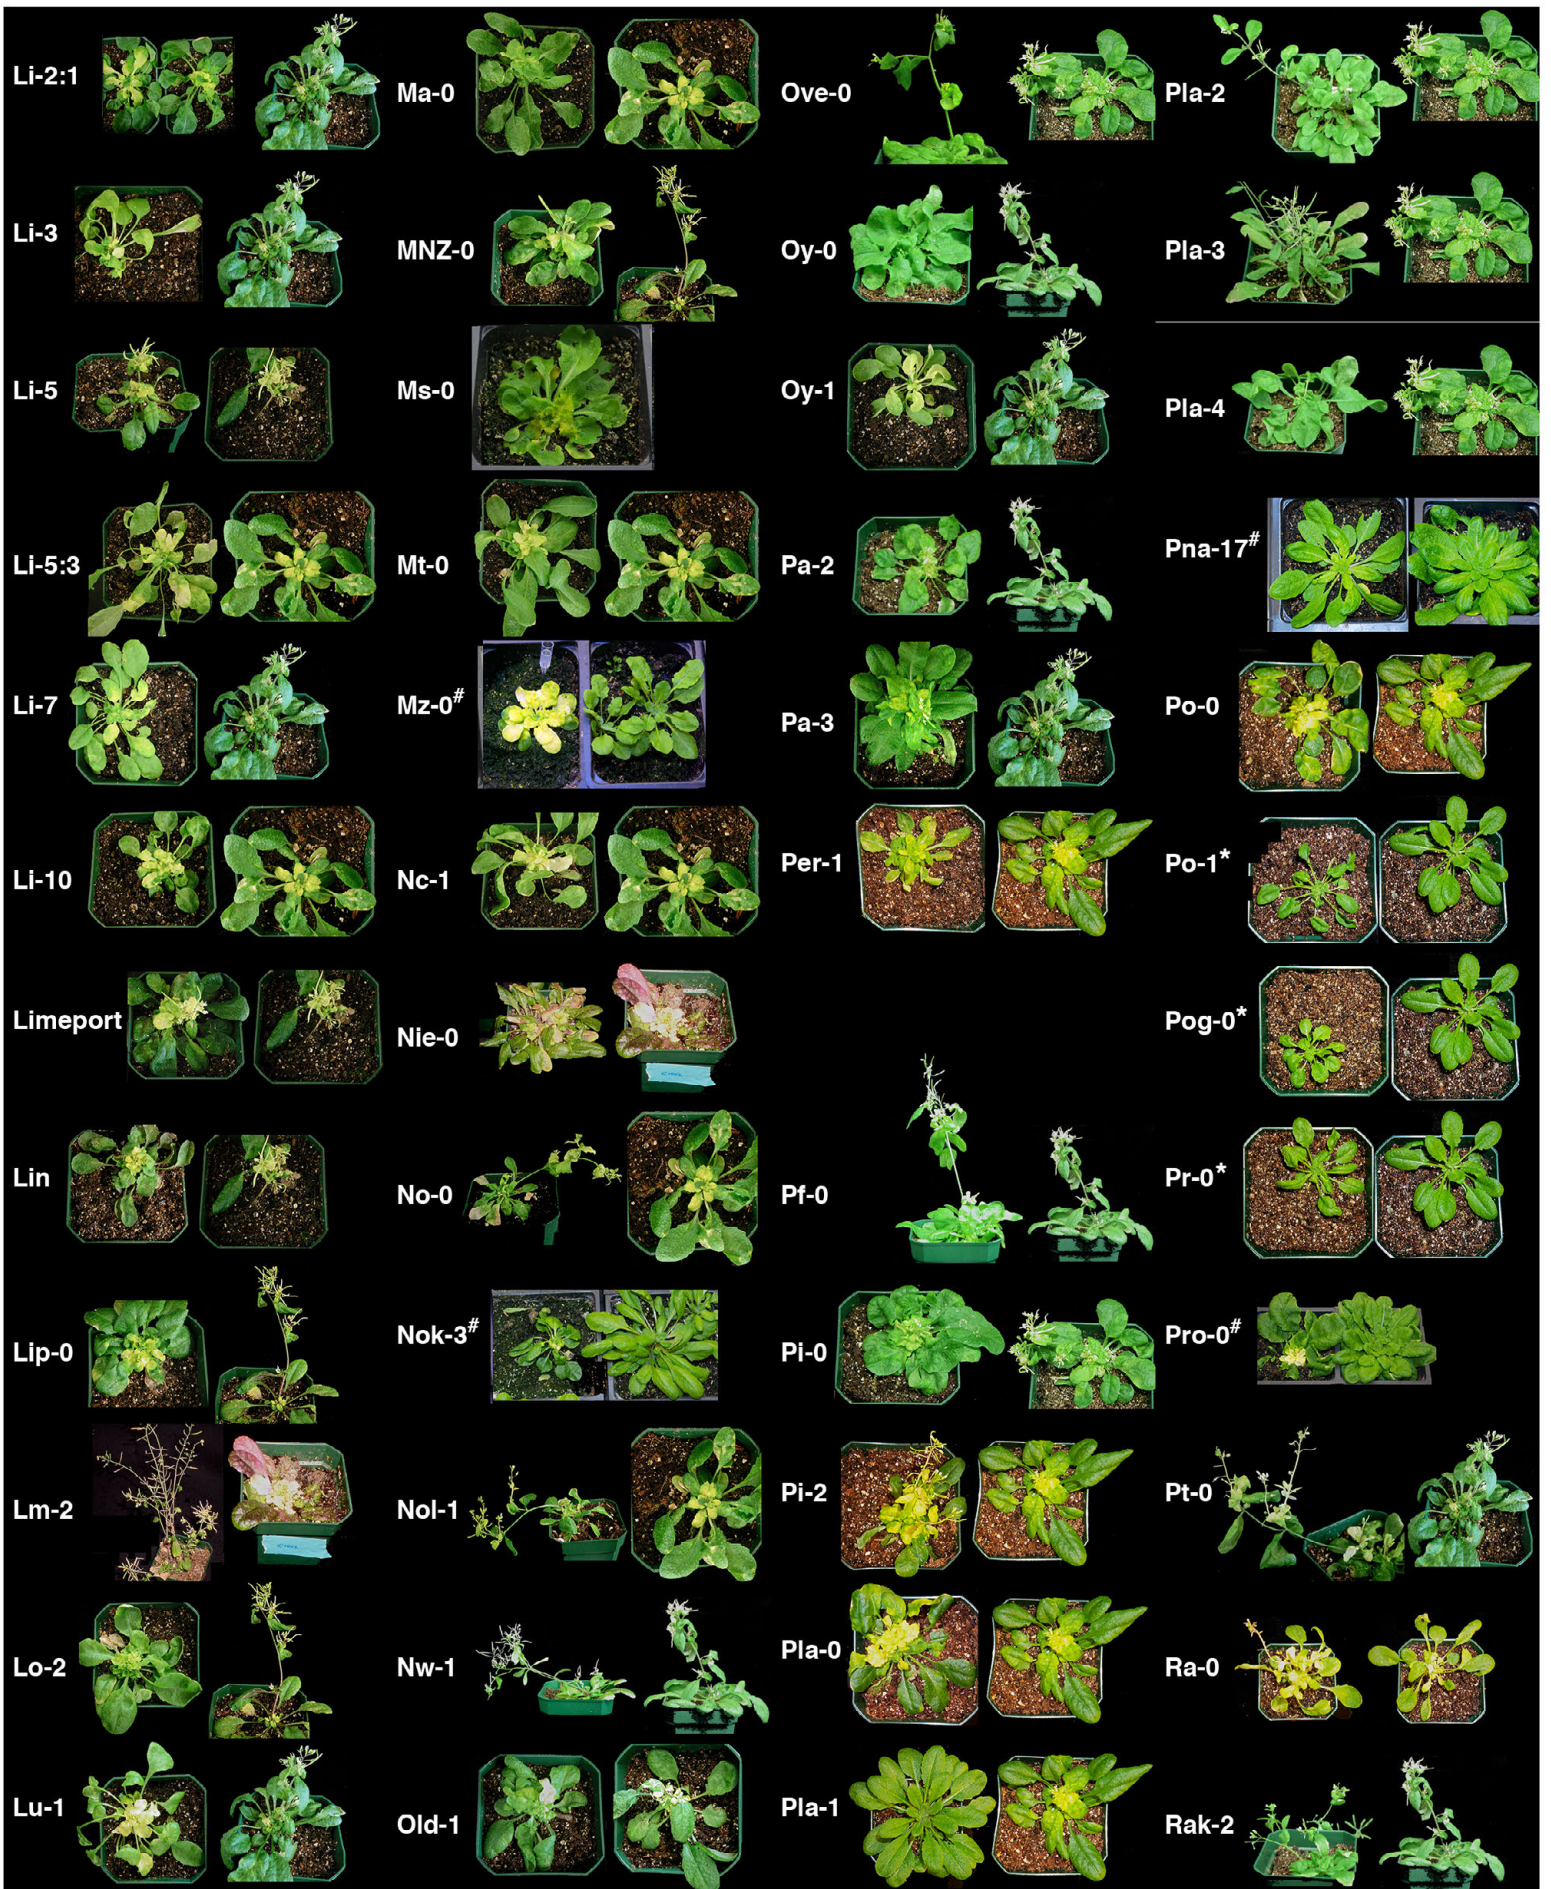

\* both the accession and Col-0 were inoculated with a GFP vector to assess symptoms

\*\* plant on the right is the same accession planted at the same time but not inoculated



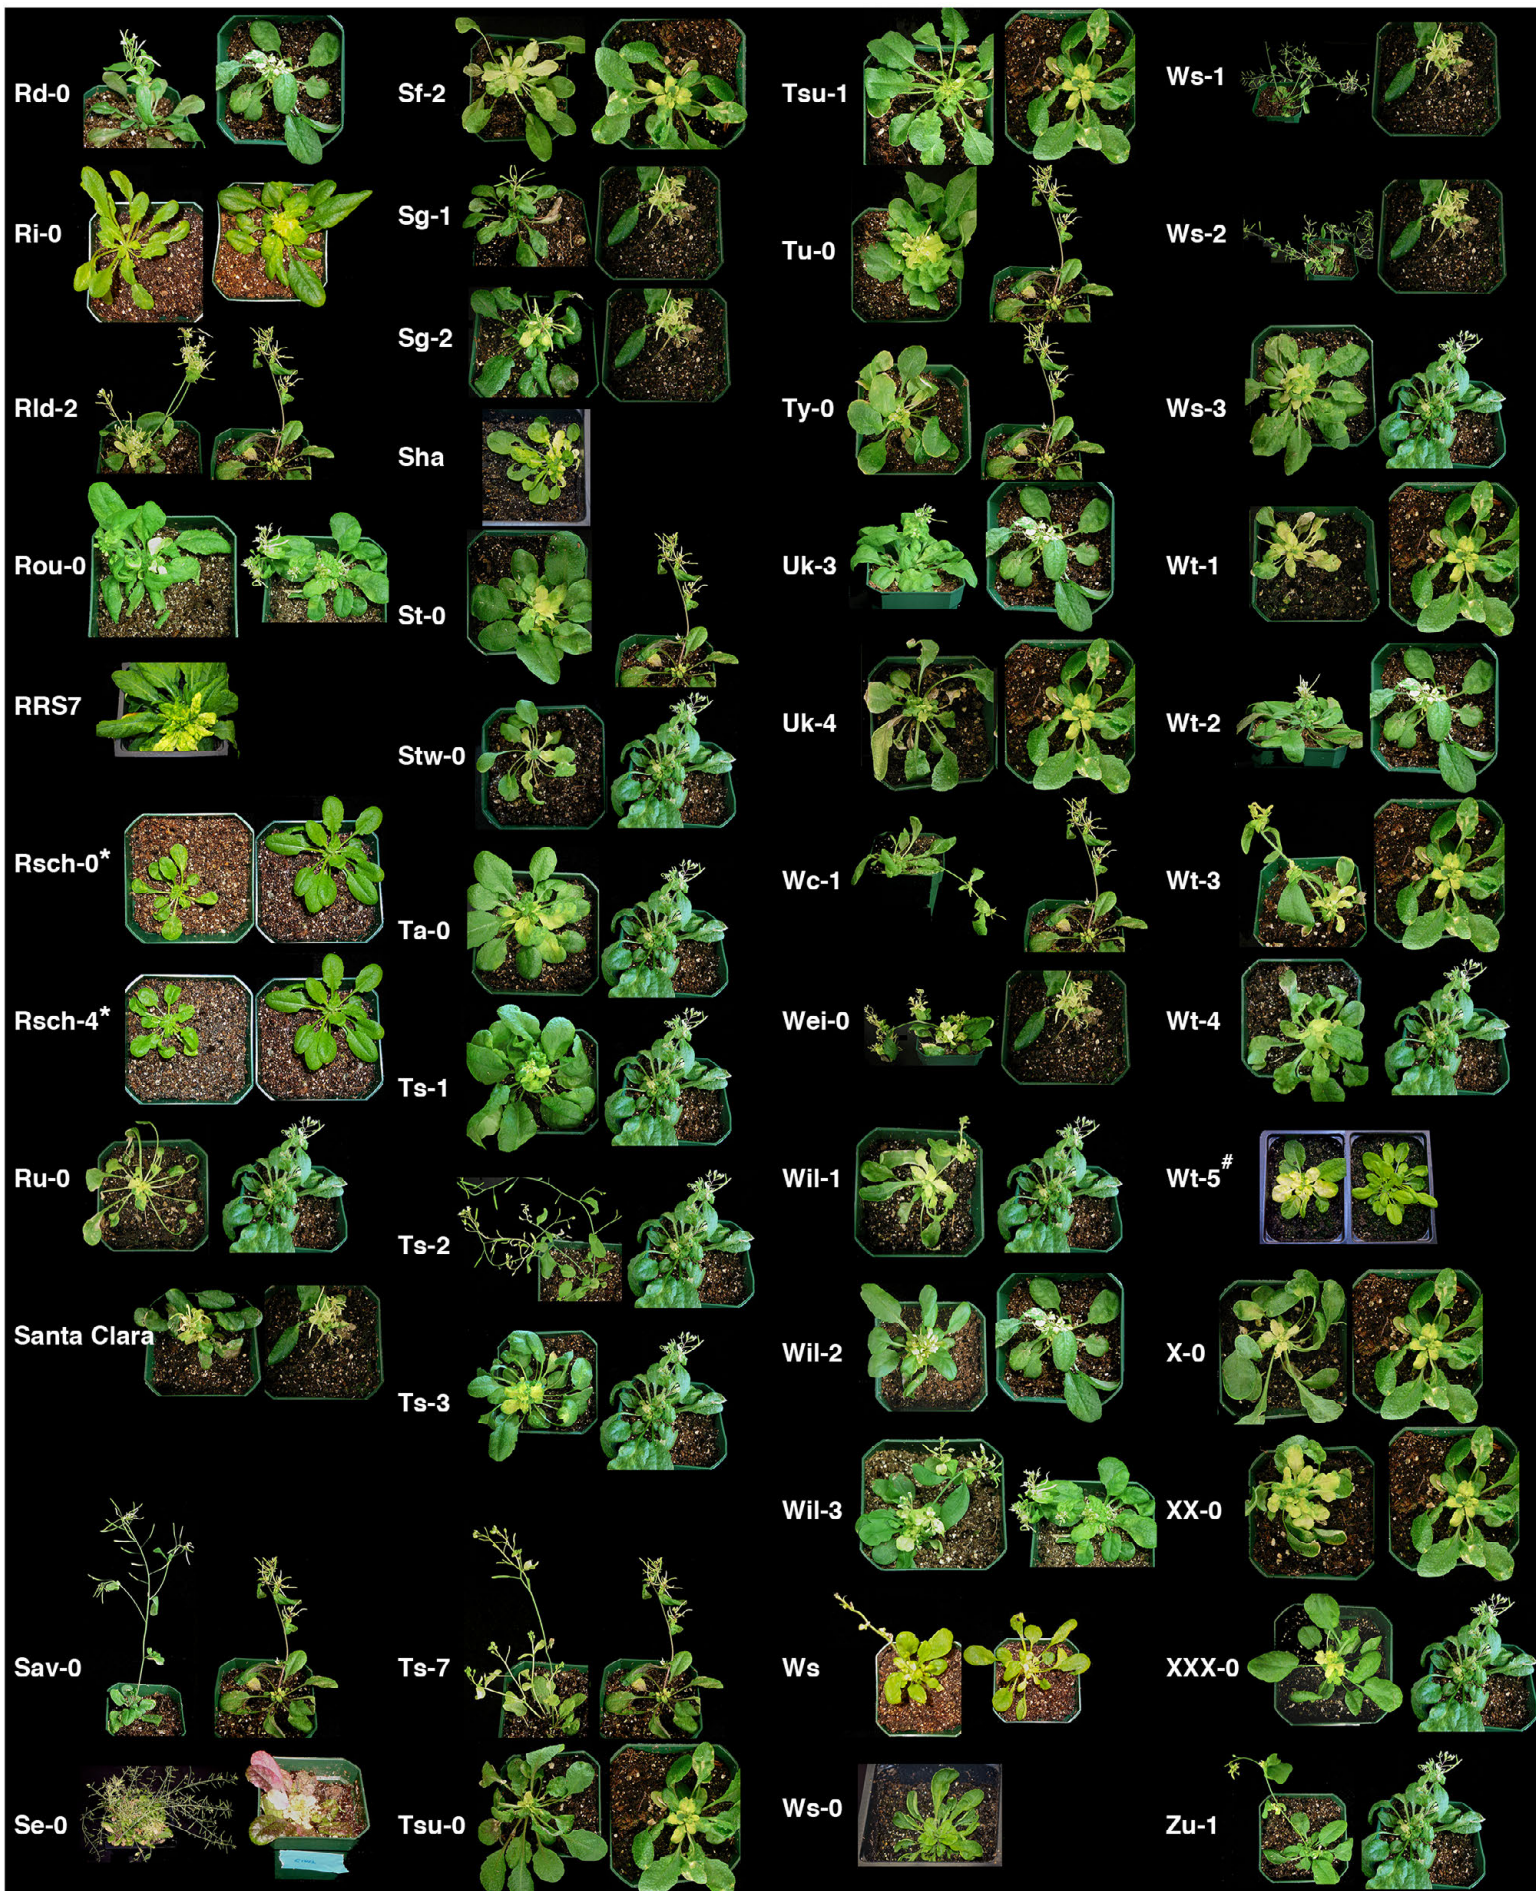

\* both the accession and Col-0 were inoculated with a GFP vector to assess symptoms

\*\* plant on the right is the same accession planted at the same time but not inoculated
