# Supplementary material for: A VIGS screen identifies immunity in the Arabidopsis Pla‐1 accession to viruses in two different genera of the Geminiviridae
Source: PubMed Central journal article supplement (PMC5725698; doi:10.1111/tpj.13716), 2017-10-24
Supplement: TPJ-92-796-s003.pdf [file TPJ-92-796-s003.pdf]

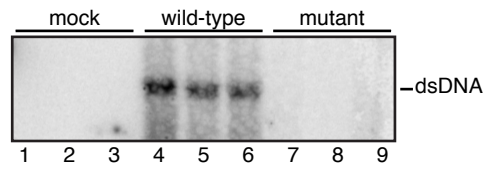

**Figure S3:** CaLCuV *ALI* frameshift mutation abolishes viral DNA replication in *Nicotiana tabacum* (NT1) protoplasts. Protoplasts were electroporated with no viral DNA (mock) (lanes 1-3), wild-type CaLCuV A DNA (lanes 4 to 6) or the replication-deficient CaLCuV A mutant DNA (lanes 7 to 9) in triplicate. Total DNA was extracted at 48-h post transfection and analyzed by DNA gel blotting using a  $^{32}\text{P}$ -labeled CaLCuV DNA-A probe. dsDNA, double-stranded DNA.
