# Supplementary material for: A VIGS screen identifies immunity in the Arabidopsis Pla‐1 accession to viruses in two different genera of the Geminiviridae
Source: PubMed Central journal article supplement (PMC5725698; doi:10.1111/tpj.13716), 2017-10-24
Supplement: TPJ-92-796-s005.pdf [file TPJ-92-796-s005.pdf]

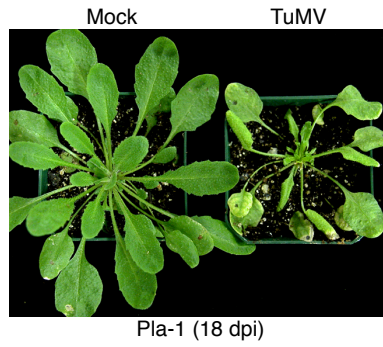

**Figure S5:** Pla-1 is susceptible to TuMV. Mock-inoculated (left panel) and TuMV-inoculated Pla-1 (right panel) photographed at 18 dpi.
