# Supplementary material for: A VIGS screen identifies immunity in the Arabidopsis Pla‐1 accession to viruses in two different genera of the Geminiviridae
Source: PubMed Central journal article supplement (PMC5725698; doi:10.1111/tpj.13716), 2017-10-24
Supplement: TPJ-92-796-s006.pdf [file TPJ-92-796-s006.pdf]

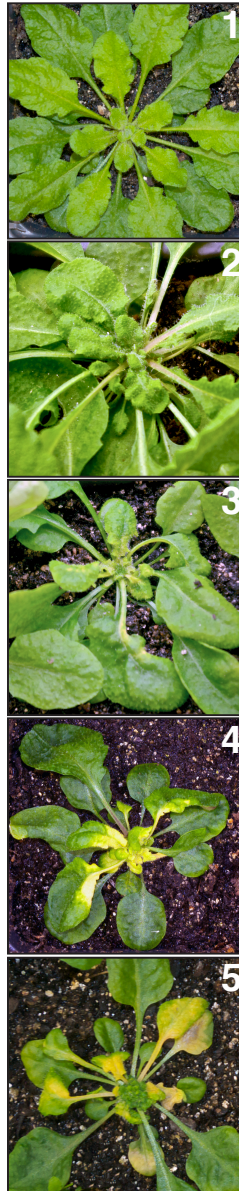

**Figure S6:** CaLCuV symptom score key. Photographs of F<sub>2</sub> plants agroinoculated with wild-type CaLCuV representing the symptom score on a scale from 1-5. 1, no symptoms; 2, curling of young leaves; 3, reticulated chlorosis in young and older leaves, leaf deformation and stunting; 4, prominent chlorosis and curling of new and older leaves, twisting of older leaves, leaf deformation and stunting; 5, severe chlorosis and stunting, new growth arrest and meristem area death.
