# Supplementary material for: A VIGS screen identifies immunity in the Arabidopsis Pla‐1 accession to viruses in two different genera of the Geminiviridae
Source: PubMed Central journal article supplement (PMC5725698; doi:10.1111/tpj.13716), 2017-10-24
Supplement: TPJ-92-796-s007.pdf [file TPJ-92-796-s007.pdf]

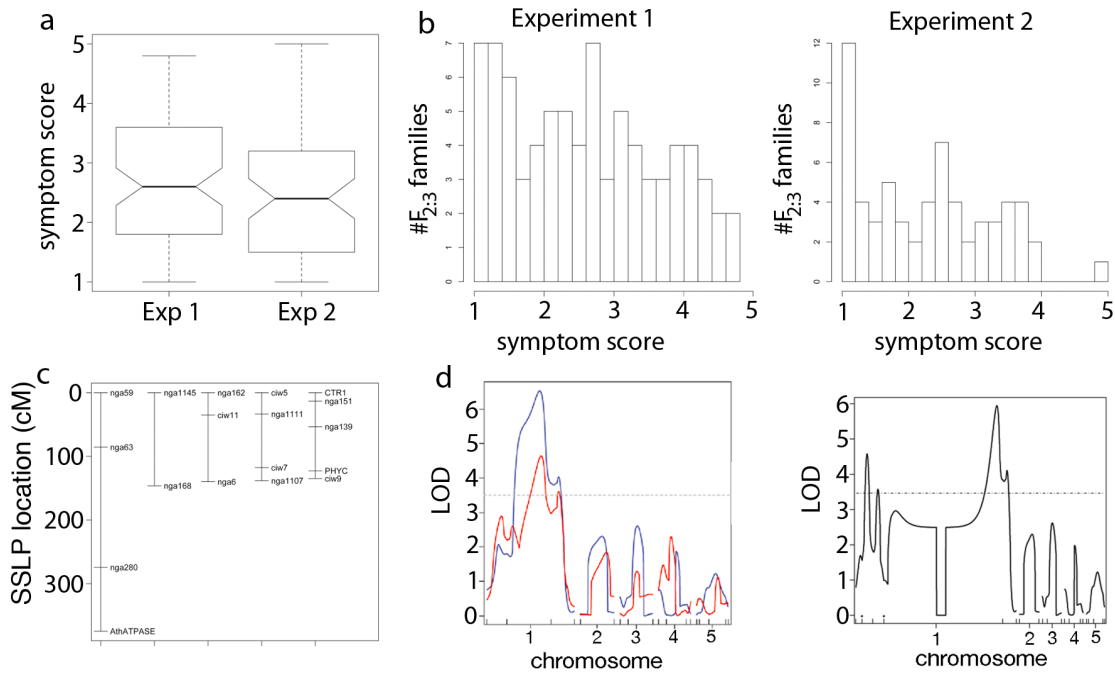

**Figure S7:** QTL maps from  $F_{2,3}$  families. 81 families derived from a cross between Pla-1 and Col-0 were scored for symptoms in three separate experiments. A box plot (a) and histogram (b) of the responses in experiments 1 and 2 are shown to compare symptom severity and overall variation. In the histogram, the number of families is shown on the Y axis and symptom level on the X axis. The first experiment scored 14 families as resistant (average score less than 0.5) out of 81 total (chi square 2.61,  $P = .11$ ) while the second had 16 out of 73 total (chi square .37,  $P = .54$ ). The relative position of the SSLP markers used for QTL mapping is shown in (c). In (d), QTL maps for the first 2 experiments are shown on the left. In the third experiment (right side), 2 additional SSLP markers were added that flank nga59 and nga63; their positions are indicated by asterisks on the x axis of the QTL plot. The F19P19-75410 marker is to the left of nga59 and the AtS0392 marker is on the right of nga63.
